# Supplementary material for: Analyses of the Global Multilocus Genotypes of the Human Pathogenic Yeast Cryptococcus neoformans Species Complex
Source: MDPI journal article supplement (doi:10.3390/genes13112045), 2022-11-06

Supplement Figure S1. Phylogenic tree showing relationship among 55 allele types (AT) of the *CAP59* gene

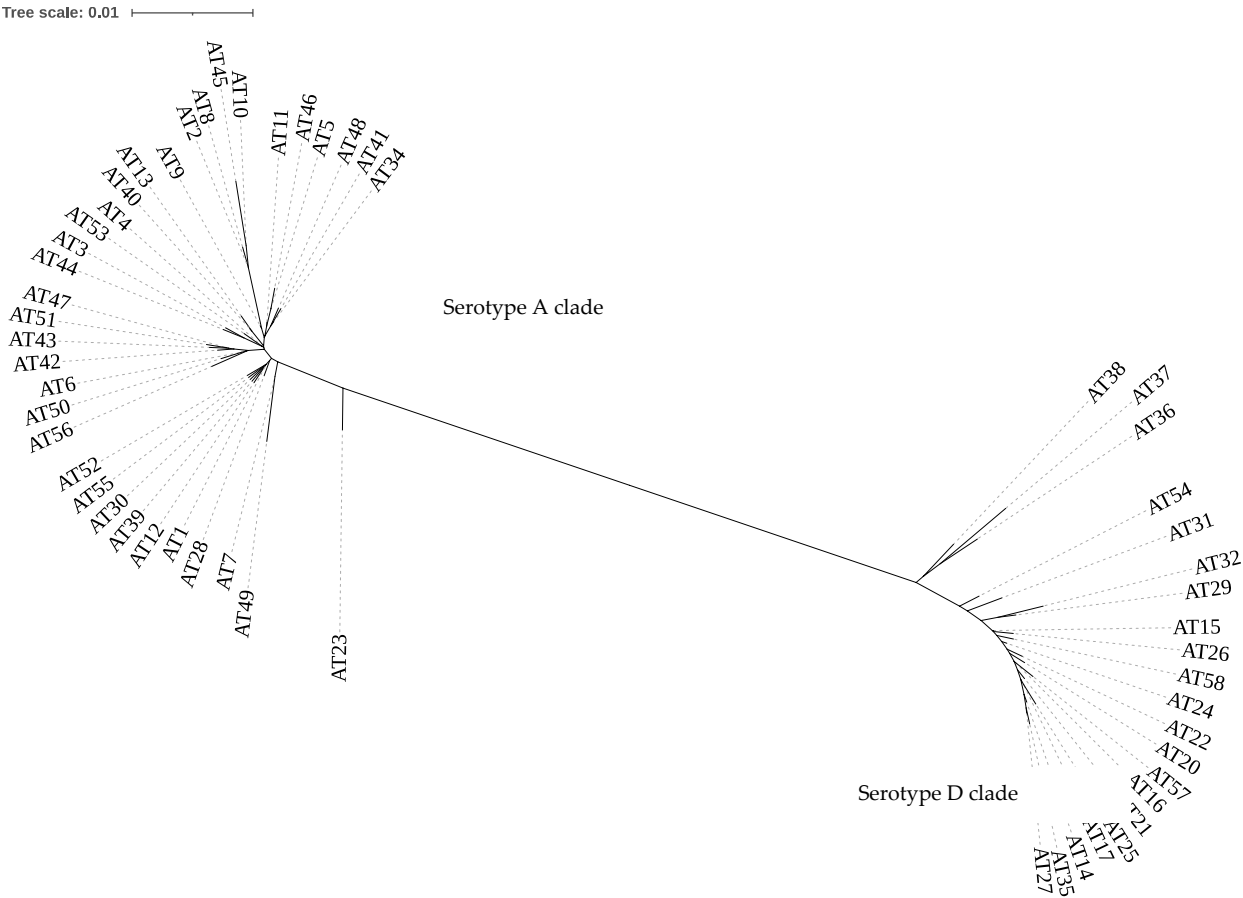

Supplement Figure S2. Phylogenic tree showing relationship among 45 allele types (AT) of the *GPD1* gene

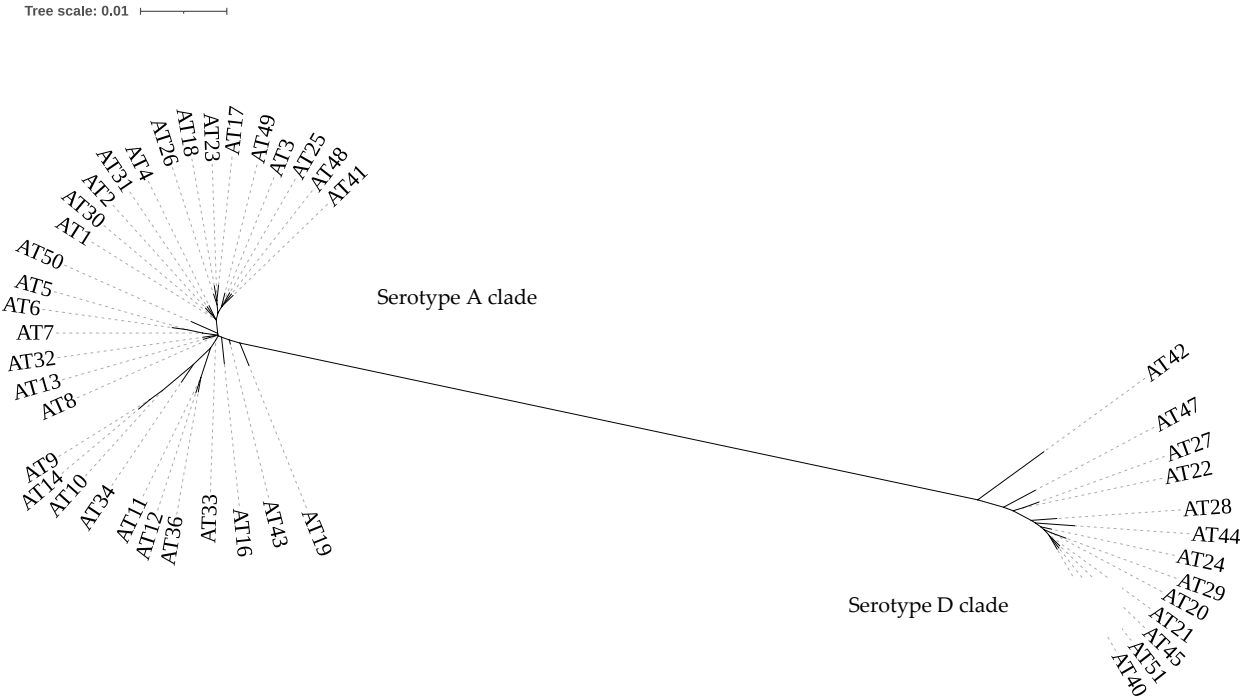

Tree scale: 0.1

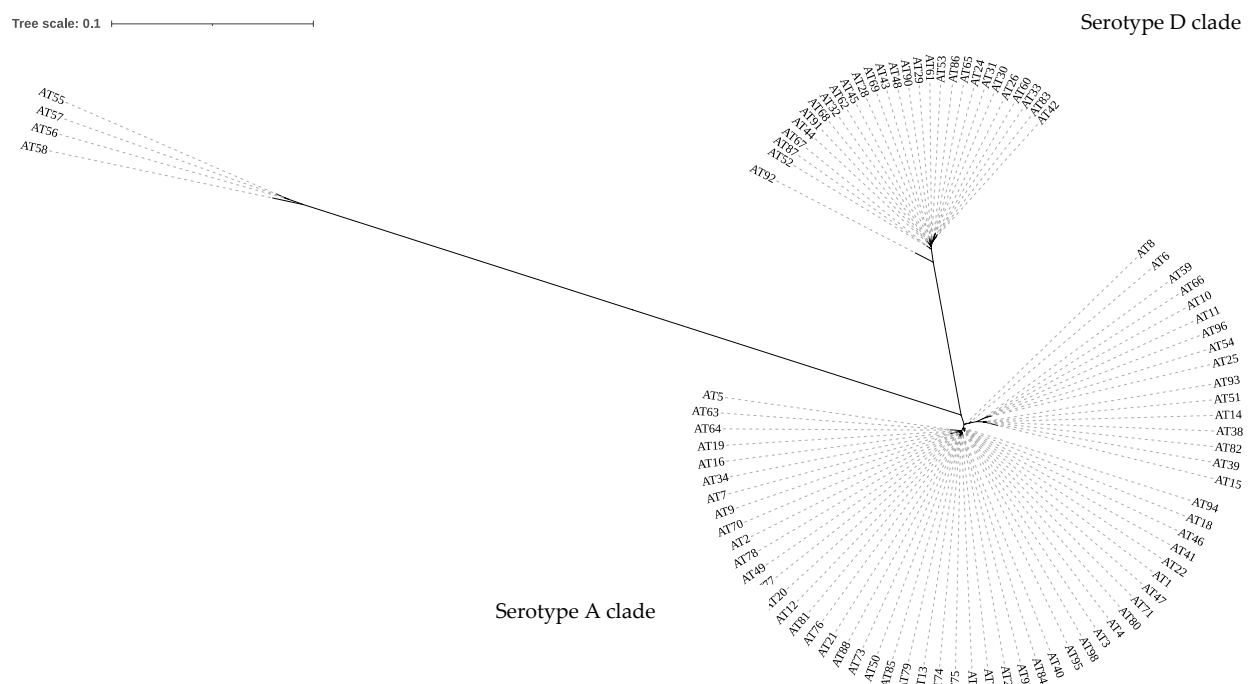

Supplement Figure S4. Phylogenic tree showing relationship among 50 allele types (AT) of the *LAC1* gene

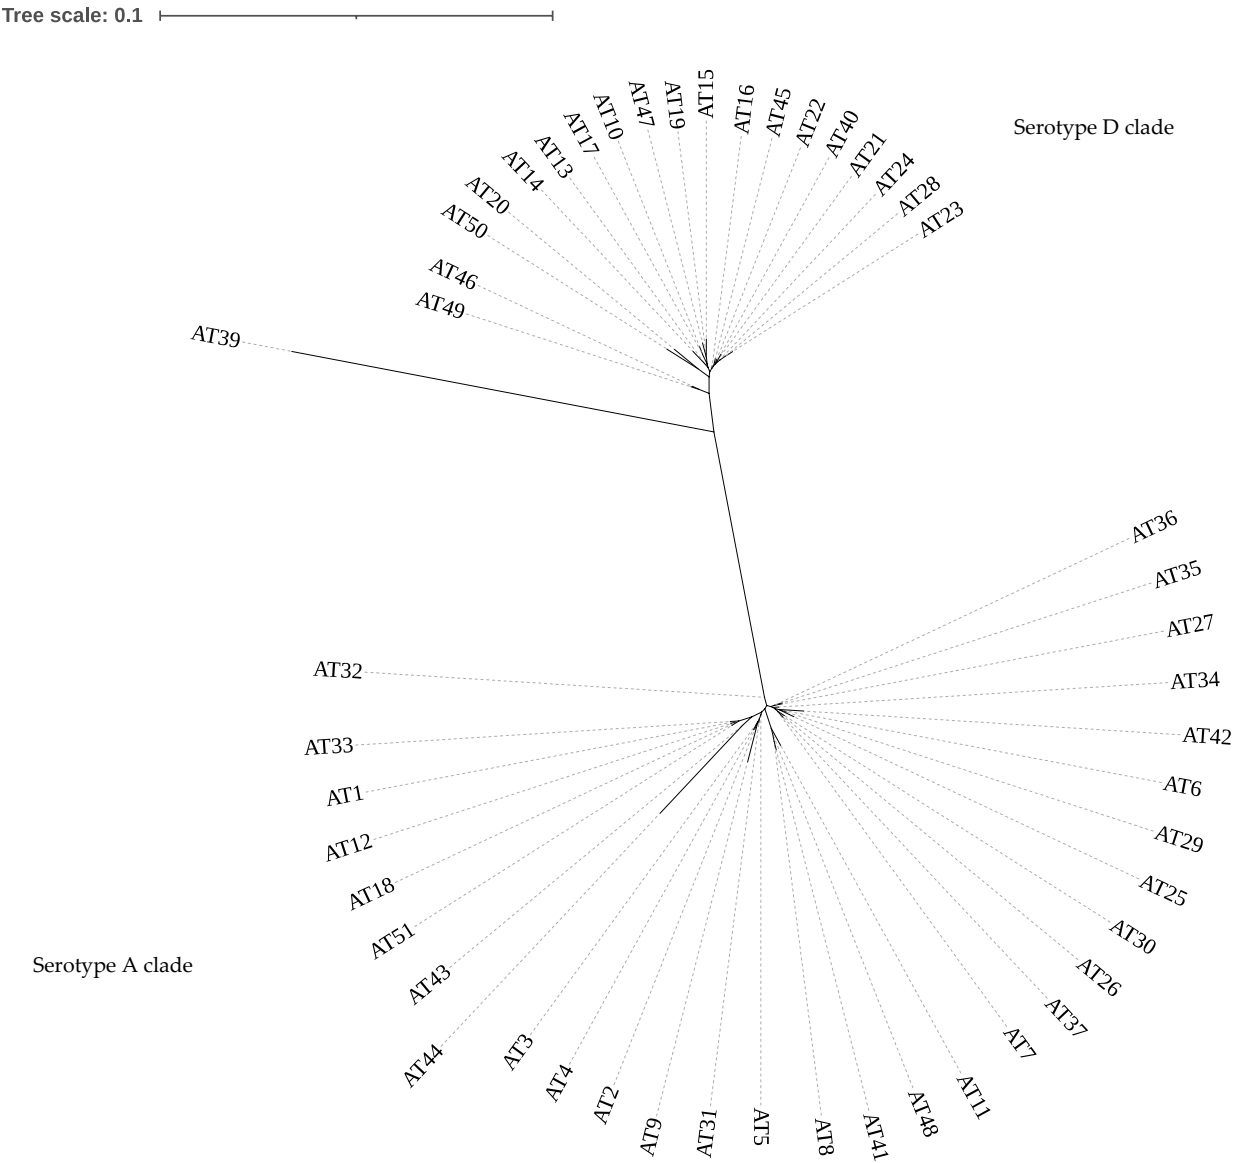

Tree scale: 0.01

Serotype A clade

Serotype D clade

Supplement Figure S6. Phylogenic tree showing relationship among 68 allele types (AT) of the *SOD1* gene

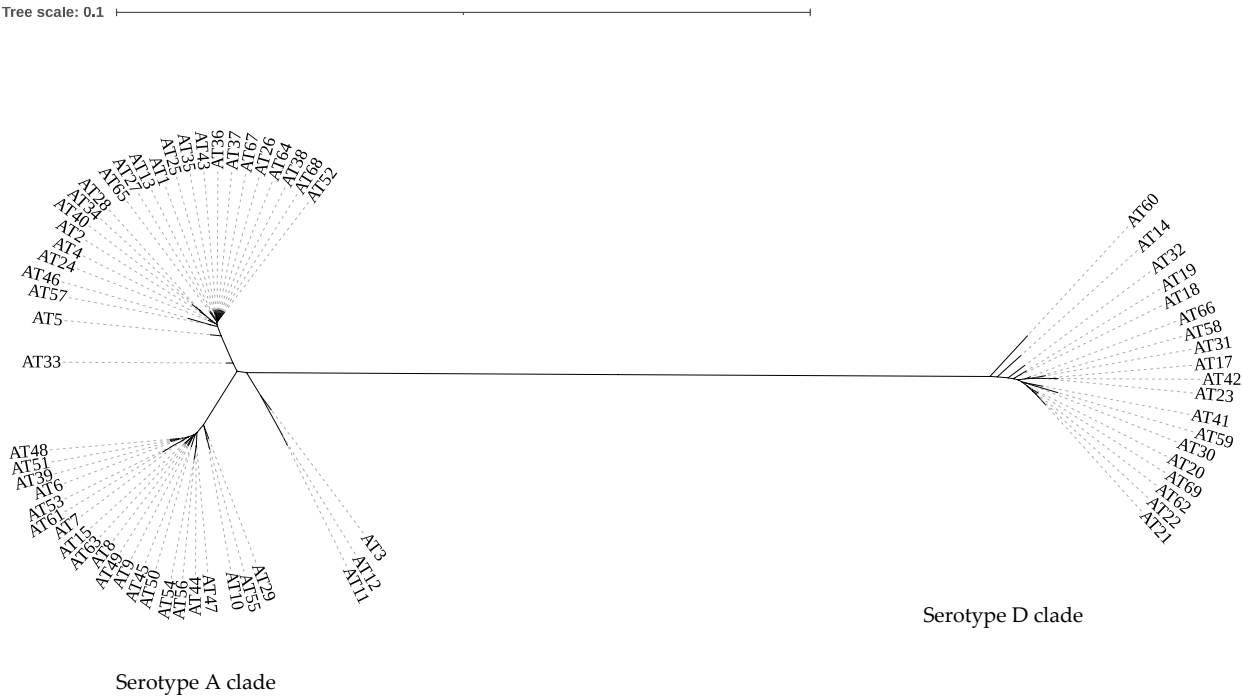

Supplement Figure S7. Phylogenic tree showing relationship among 57 allele types (AT) of the *URA5* gene

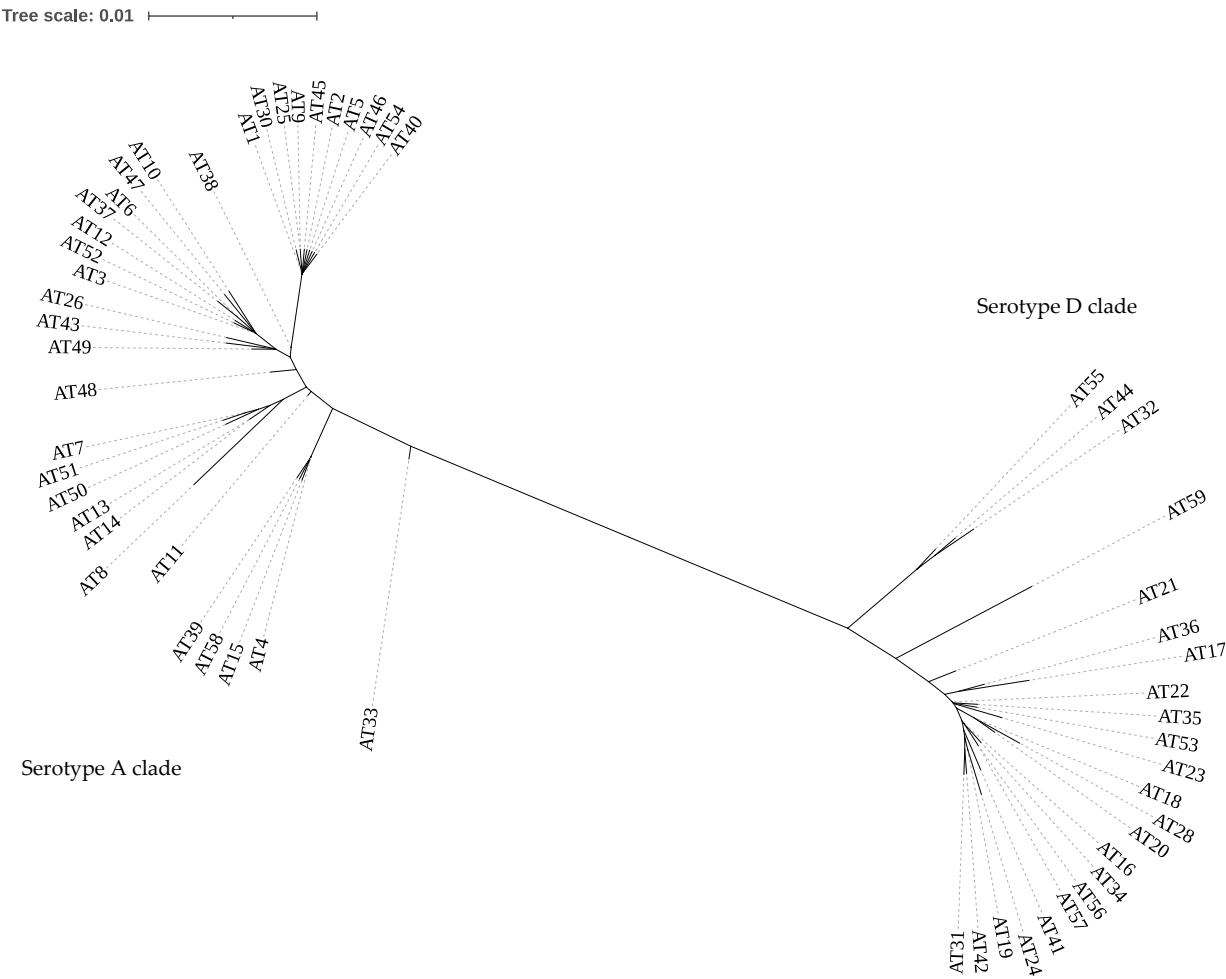

Supplement: s1 [file s1]
