# Supplementary material for: Analyses of the Global Multilocus Genotypes of the Human Pathogenic Yeast Cryptococcus neoformans Species Complex
Source: MDPI journal article supplement (doi:10.3390/genes13112045), 2022-11-06
Supplement: s1 [file s1]

Archive with 1 entries (1 files):
- genes-1991116-supplementary.pdf
